# Supplementary material for: Antibacterial Activity of Zinc Oxide Nanoparticles Loaded with Essential Oils
Source: MDPI journal article supplement (doi:10.3390/pharmaceutics15102470), 2023-10-15
Supplement: s1 [file s1]

Article

# Antibacterial Activity of Zinc Oxide Nanoparticles Loaded with Essential Oils

Ludmila Motelica <sup>1,2</sup>, Bogdan-Stefan Vasile <sup>1,2,3</sup>, Anton Ficai <sup>1,2,3,4</sup>, Adrian-Vasile Surdu <sup>1,2,3</sup>, Denisa Ficai <sup>1,2,3</sup>, Ovidiu-Cristian Oprea <sup>1,2,3,4\*</sup>, Ecaterina Andronesco <sup>1,2,3,4</sup>, Gabriel Mustăţea<sup>5</sup>, Elena Loredana Ungureanu<sup>5</sup> and Alina Alexandra Dobre<sup>5</sup>

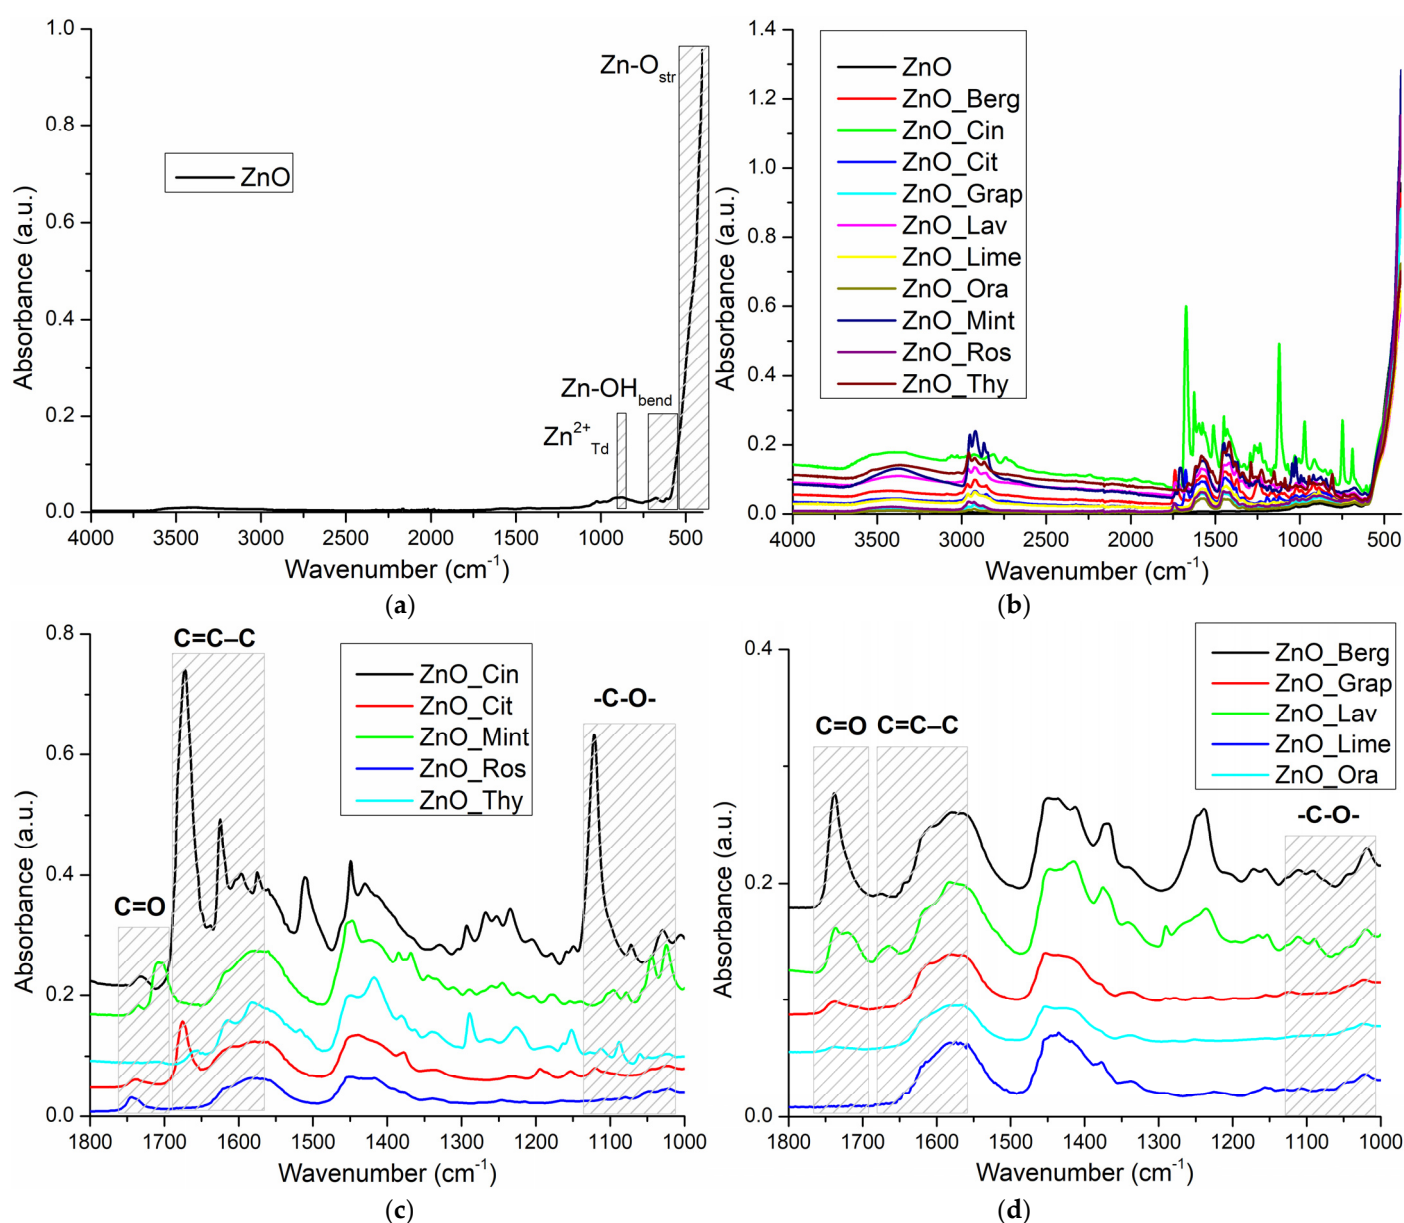

**Figure S1.** The FTIR spectra for the ZnO NPs (a) and ZnO NPs loaded with essential oils (b); detail of the 1000–1800 cm<sup>-1</sup> zone (c) and (d).

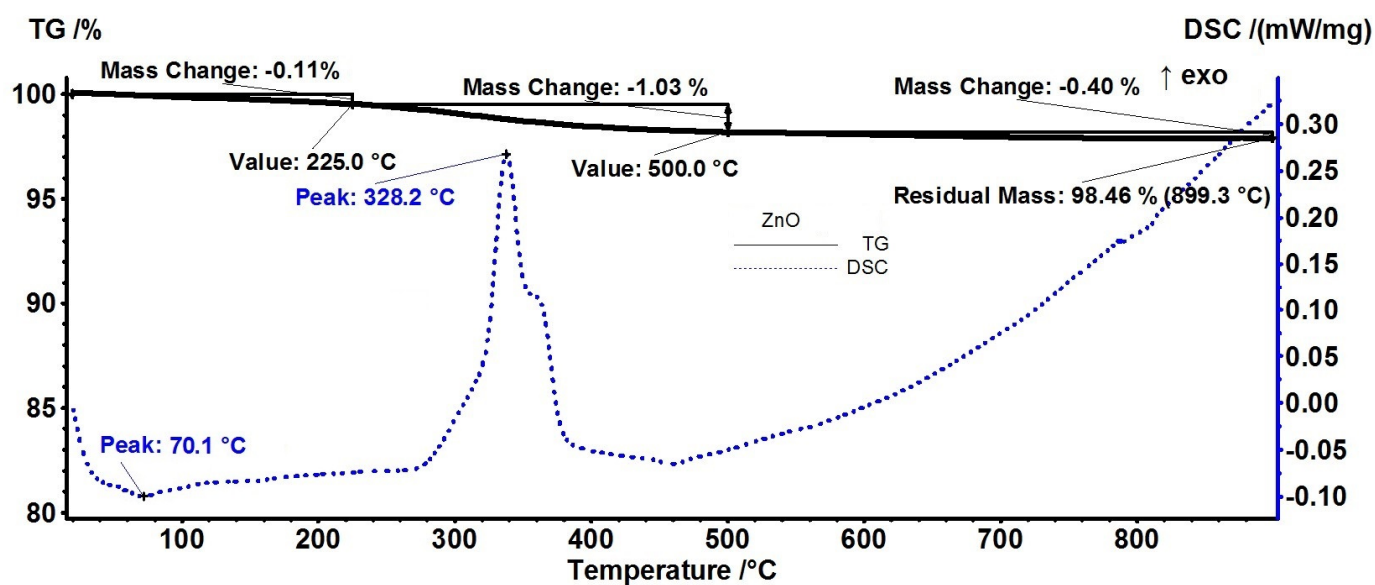

Figure S2. The TG-DSC curves for the ZnO NPs

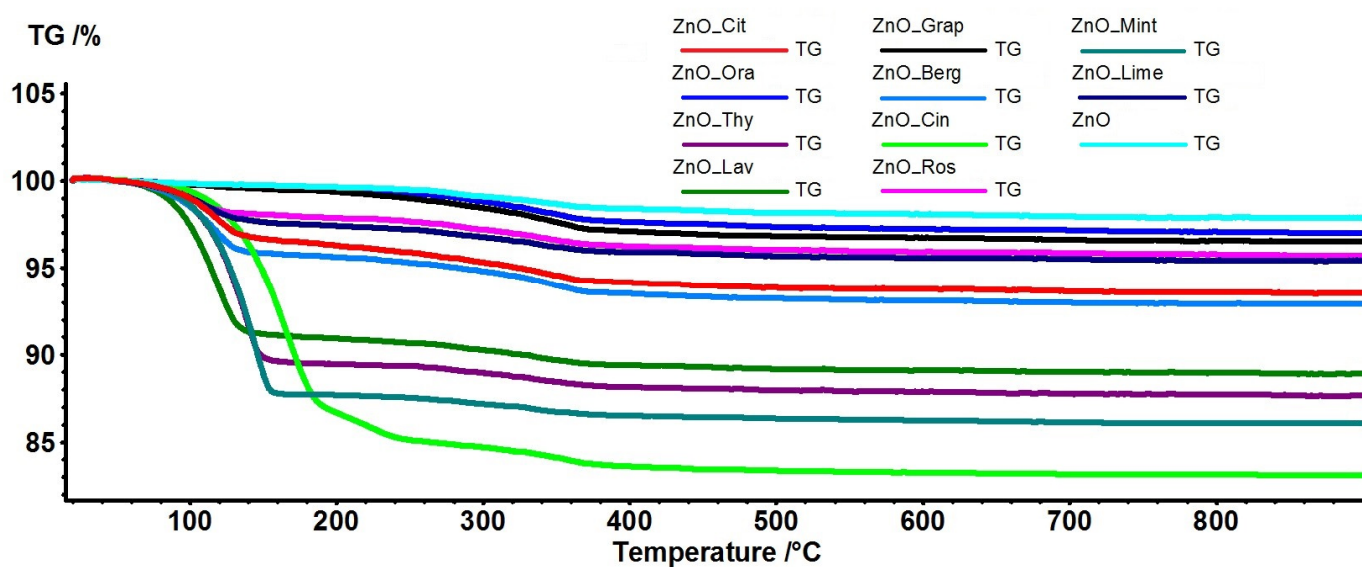

Figure S3. The TG curves for the ZnO NPs and ZnO NPs loaded with essential oils
